# Supplementary material
Source: Springer Nature journal article supplement (https://www.springermedizin.de/resource/supplementary/12875_2007_274_MOESM4_ESM.pdf/9436704)
Supplement: MOESM4 [file 9436704]

**Answer from  
GPs at 642  
appointments**

**Answer from  
patients at 521  
appointments**

**Answer from GP  
but not from  
patient at 168  
appointments**

**Answer from  
patient and GP at  
474 appointments**

**Answer from patient  
but not from GP at  
47 appointments**
